# Supplementary material for: Transportation Insecurity, Social Support, and Adherence to Cancer Screening
Source: PubMed Central journal article supplement (PMC11783192; doi:10.1001/jamanetworkopen.2024.57336), 2025-01-30
Supplement: jamanetwopen-e2457336-s002.pdf [file jamanetwopen-e2457336-s002.pdf]

## **Data Sharing Statement**

Pohl. Transportation Insecurity, Social Support, and Adherence to Cancer Screening. *JAMA Netw Open*. Published January 30, 2025. doi:10.1001/jamanetworkopen.2024.57336

### **Data**

**Data available:** No

### **Additional Information**

**Explanation for why data not available:** This is publicly available data.
